# Supplementary material for: Re-analysis of genetic risks for Chronic Fatigue Syndrome from 23andMe data finds few remain
Source: bioRxiv or medRxiv preprint supplement (doi:10.1101/2020.10.27.20220939), 2020-10-31

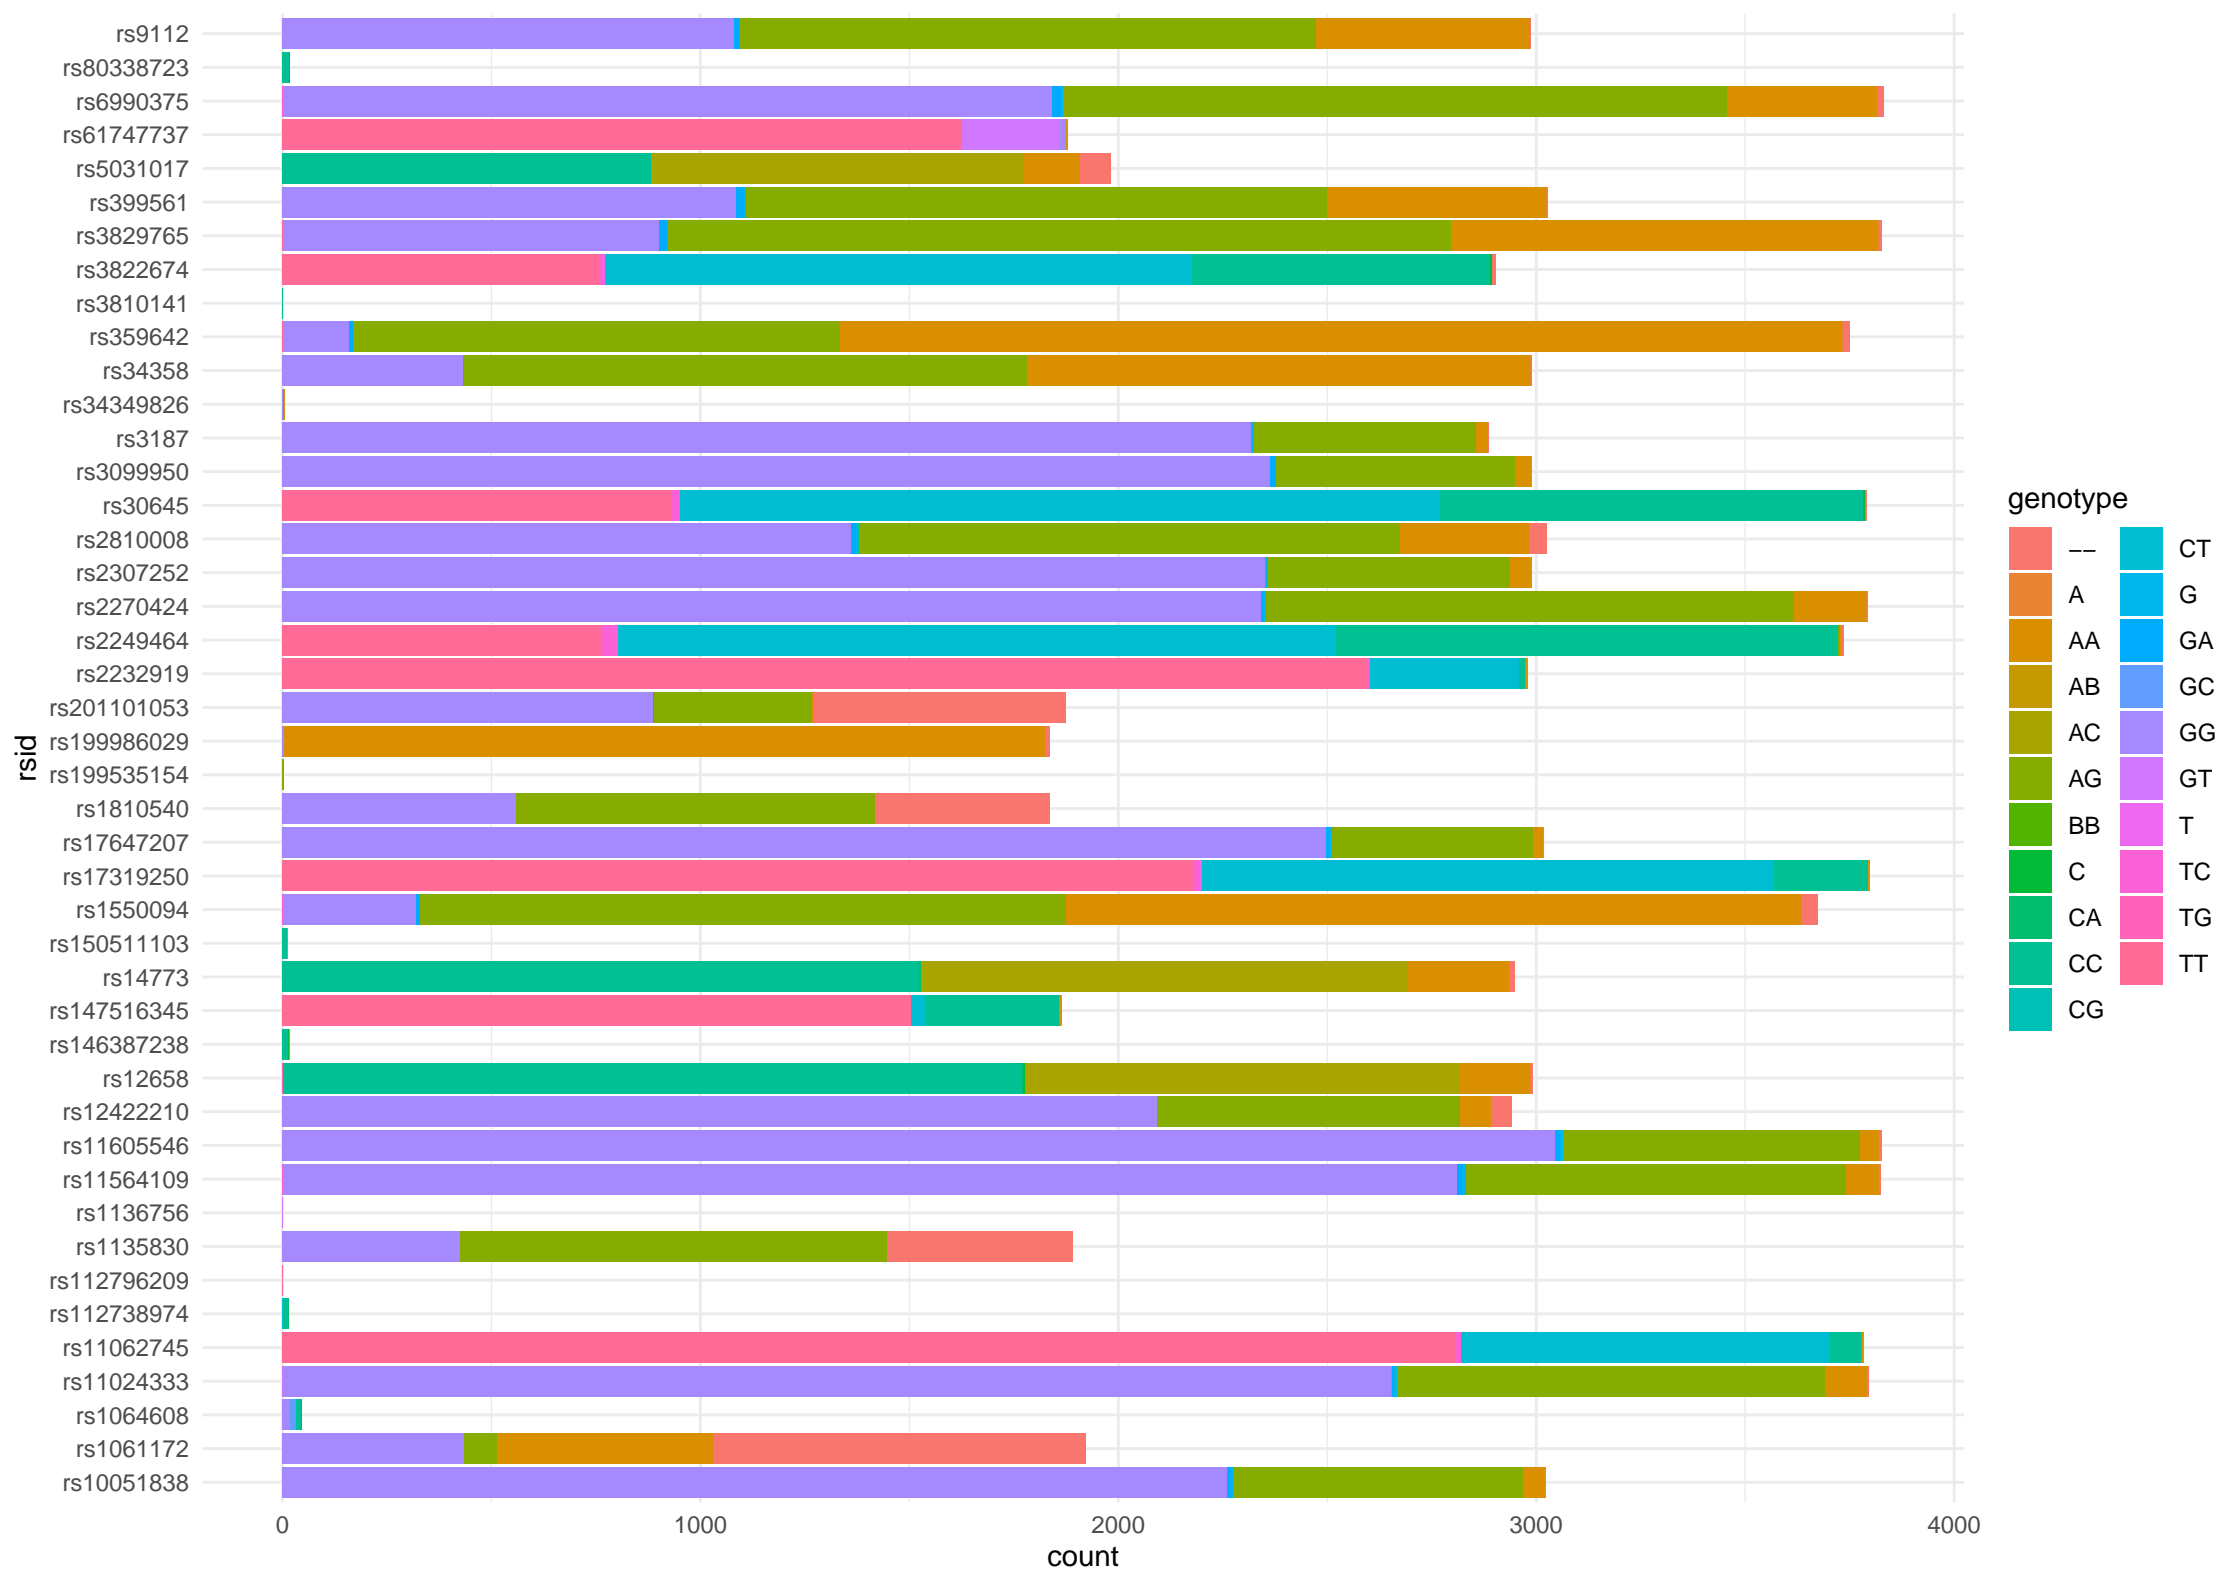

Supplement: Supplementary file [file media-1.pdf]
